# Supplementary material
Source: PubMed Central journal article supplement (PMC552890)
Supplement: cmaj_172_6_765__1.pdf [file cmaj_172_6_765__1.pdf]

**e-Appendix 1: Products withdrawn from the Canadian market because of safety concerns between 1963 and 2004**

| Drug                  | Class/indication                              | Reason for withdrawal*                                        | Date of Notice of Compliance/<br>year first listed<br>in <i>CPS</i> | Date<br>withdrawn/<br>year last listed<br>in <i>CPS</i> | Source of<br>information about<br>withdrawal                  | Listed in Drug<br>Product<br>Database† as<br>discontinued              |
|-----------------------|-----------------------------------------------|---------------------------------------------------------------|---------------------------------------------------------------------|---------------------------------------------------------|---------------------------------------------------------------|------------------------------------------------------------------------|
| Aminopyrine           | Analgesic                                     | Bone marrow suppression, agranulocytosis                      | 1960                                                                | 1963                                                    | Withdrawn from US and/or UK markets                           | No                                                                     |
| Astemizole            | Antihistamine                                 | Cardiac arrhythmias                                           | 1985                                                                | Sept. 1999                                              | Health Canada                                                 | Yes                                                                    |
| Benoxaprofen‡         | Analgesic, anti-inflammatory                  | Hepatotoxicity                                                | Feb. 1982                                                           |                                                         | Withdrawn from US and/or UK markets                           | No                                                                     |
| Bithionol§            | Antipruritic/antiseptic                       | Photosensitivity                                              | 1960                                                                | Apr. 4, 1968                                            | Health Canada                                                 | No                                                                     |
| Bunamiodyl            | Cholecystographic medium for cholecystography | Nephropathy                                                   | 1963                                                                | 1963                                                    | Withdrawn from US and/or UK markets                           | No                                                                     |
| Cerivastatin          | Cholesterol lowering                          | Rhabdomyolysis                                                | Feb. 18, 1998                                                       | Aug. 8, 2001                                            | Rawson and Kaitin <sup>7</sup>                                | Yes                                                                    |
| Chlormezanone         | Muscle relaxant, tranquilizer, anxiolytic     | Severe cutaneous reactions (e.g., toxic epidermal necrolysis) | 1960                                                                | 1991                                                    | Withdrawn from US and/or UK markets                           | No                                                                     |
| Cisapride             | Gastrointestinal dysmotility                  | Cardiac arrhythmias, sudden cardiac deaths                    | Aug. 15, 1991                                                       | Aug. 7, 2000                                            | Rawson and Kaitin <sup>7</sup>                                | Yes                                                                    |
| Clioquinol            | Antidiarrheal                                 | Neurotoxicity                                                 | 1960                                                                | 1983                                                    | Withdrawn from US and/or UK markets; confirmed by company     | No (topical creams, ointments, vaginal tablets listed as discontinued) |
| Danthron              | Laxative                                      | Genotoxicity                                                  | 1963                                                                | 1998                                                    | Withdrawn from US and/or UK markets                           | Yes                                                                    |
| Dexfenfluramine       | Appetite suppressant                          | Cardiac valve disease                                         | July 1996                                                           | Sept. 15, 1997                                          | Health Canada                                                 | No                                                                     |
| Dipyrrone             | Analgesic                                     | Agranulocytosis                                               | 1960                                                                | 1963                                                    | Withdrawn from US and/or UK markets                           | No for human use (veterinary injectable listed as discontinued)        |
| Etretinate            | Keratinization disorder therapy               | Teratogenicity                                                | 1985                                                                | 1995                                                    | Withdrawn from US and/or UK markets                           | No                                                                     |
| Fenfluramine          | Appetite suppressant                          | Cardiac valve disease                                         | Oct. 22, 1970                                                       | Sept. 15, 1997                                          | Health Canada                                                 | Yes                                                                    |
| Grepafloxacin         | Antibiotic                                    | Cardiac arrhythmias                                           | Apr. 9, 1998                                                        | Oct. 26, 1999                                           | Rawson and Kaitin <sup>7</sup>                                | Yes                                                                    |
| Iproniazid            | Antidepressant                                | Interactions with food products containing tyrosine           | 1960                                                                | July 1964                                               | Health Canada                                                 | No                                                                     |
| Methapyrilene         | Antihistamine                                 | Carcinogenicity (in rats)                                     | 1960                                                                | July 11, 1979                                           | Health Canada                                                 | No (veterinary ear liquid listed as discontinued)                      |
| Nefazodone            | Antidepressant                                | Hepatotoxicity                                                | 1994                                                                | Nov. 27, 2003                                           | Health Canada                                                 | Yes                                                                    |
| Neomycin (injectable) | Antimicrobial                                 | Nephropathy, neurotoxicity (nerve deafness)                   | 1967                                                                | 1989                                                    | Withdrawn from US and/or UK markets; not confirmed by company | No                                                                     |
| Nialamide             | Antidepressant                                | Interactions with food products containing tyrosine           | 1960                                                                | 1963                                                    | Withdrawn from US and/or UK markets                           | No                                                                     |

|                                        |                                  |                                                                                             |               |                |                                                                                                                     |                                      |
|----------------------------------------|----------------------------------|---------------------------------------------------------------------------------------------|---------------|----------------|---------------------------------------------------------------------------------------------------------------------|--------------------------------------|
| Nomifensine                            | Antidepressant                   | Hemolytic anemia                                                                            | May 1983      | Jan. 20, 1986  | Withdrawn from US and/or UK markets; confirmed by company                                                           | No                                   |
| Oxeladin                               | Antitussive                      | Carcinogenicity                                                                             | 1967          | 1976           | Withdrawn from US and/or UK markets                                                                                 | No                                   |
| Oxyphenbutazone                        | Anti-inflammatory                | Bone marrow suppression                                                                     | 1961          | Mar. 29, 1985  | Material from company                                                                                               | No                                   |
| Oxyphenisatin                          | Laxative                         | Hepatotoxicity                                                                              | 1967          | July 1, 1978   | Health Canada                                                                                                       | No                                   |
| Pemoline                               | Central nervous system stimulant | Hepatotoxicity                                                                              | Mar. 3, 1977  | Sept. 30, 1999 | Health Canada                                                                                                       | No (ointment listed as discontinued) |
| Phenacetin                             | Analgesic                        | Nephropathy                                                                                 | 1960          | June 1973      | In UN Consolidated List                                                                                             | No                                   |
| Phenformin                             | Oral hypoglycemic                | Lactic acidosis                                                                             | 1960          | 1977           | In UN Consolidated List                                                                                             | No                                   |
| Phenolphthalein                        | Laxative                         | Carcinogenicity                                                                             | 1967          | Sept. 30, 1997 | In UN Consolidated List                                                                                             | Yes                                  |
| Phenylpropanolamine                    | Decongestant                     | Hemorrhagic stroke                                                                          | 1960          | May 30, 2001   | Health Canada                                                                                                       | Yes                                  |
| Potassium chloride (enteric coated)    | Potassium replacement            | Small-bowel ulceration                                                                      | 1960          | 1963           | Withdrawn from US and/or UK markets                                                                                 | No                                   |
| Prenylamine                            | Antianginal                      | Cardiac arrhythmias                                                                         | July 1965     | Oct 1988       | Withdrawn from US and/or UK markets                                                                                 | No                                   |
| Remoxipride                            | Antipsychotic                    | Aplastic anemia                                                                             | July 26, 1993 | Mar. 14, 1994  | Rawson and Kaitin <sup>7</sup>                                                                                      | No                                   |
| Sulfamethoxy-pyridazine                | Antimicrobial                    | Bone marrow suppression, severe cutaneous reactions, nephrotoxicity                         | 1960          | 1978           | Withdrawn from US and/or UK markets                                                                                 | No                                   |
| Terfenadine                            | Antihistamine                    | Cardiac arrhythmias                                                                         | May 1983      | June 1, 1998   | Health Canada                                                                                                       | Yes                                  |
| Thenalidine                            | Allergic and pruritic conditions | Neutropenia                                                                                 | 1960          | 1963           | Withdrawn from US and/or UK markets; company unable to find any information about reason for withdrawal from Canada | No                                   |
| Tolcapone                              | Parkinson's disease              | Hepatotoxicity                                                                              | Late 1997     | Nov. 20, 1998  | Health Canada                                                                                                       | Yes                                  |
| Tranlycypromine and trifluoroperazine¶ | Depression                       | Combination used in some situations that were not of sufficient gravity to justify the risk | 1960          | July 24, 1964  | Health Canada                                                                                                       | No                                   |
| Troglitazone**                         | Oral hypoglycemic                | Hepatotoxicity                                                                              | May 9, 1997   |                | Rawson and Kaitin <sup>7</sup>                                                                                      | No                                   |
| Trovafloxacin                          | Antibiotic                       | Hepatotoxicity                                                                              | Dec. 4, 1998  | Nov. 22, 2001  | Rawson and Kaitin <sup>7</sup>                                                                                      | Yes                                  |
| Urethane                               | Leukemia                         | Carcinogenicity, mutagenicity                                                               | 1960          | 1963           | Withdrawn from US and/or UK markets                                                                                 | No                                   |
| Zomepirac                              | Analgesic                        | Anaphylaxis                                                                                 | 1981          | 1983           | Withdrawn from US and/or UK markets                                                                                 | No                                   |

Note: CPS = Compendium of Pharmaceuticals and Specialties.

\*Information is from Health Canada where available. Otherwise it is from the United States, the United Kingdom or the following United Nations publication: Department of Economic and Social Affairs. Consolidated list of products whose consumption and/or sale have been banned, withdrawn, severely restricted or not approved by government. Eighth issue: Pharmaceuticals. New York: United Nations; 2003.<sup>12</sup>

†Maintained by Health Canada on its Web site ([www.hc-sc.gc.ca/hpfb-dgpsa/tpd-dpt/index\\_drugs\\_dpd\\_e.html](http://www.hc-sc.gc.ca/hpfb-dgpsa/tpd-dpt/index_drugs_dpd_e.html)).

‡Never marketed due to recognition of adverse drug reactions in the United Kingdom and the United States.

§Combination product (Actamer) withdrawn because of this component.

¶Combination withdrawn. Individual drugs remained on the market.

\*\*Never sold because of a dispute between the company and the Patented Medicine Prices Review Board about the introductory price.
